# Supplementary material for: Loss of Parp7 increases type I interferon signalling and reduces pancreatic tumour growth by enhancing immune cell infiltration
Source: Front Immunol. 2025 Jan 10;15:1513595. doi: 10.3389/fimmu.2024.1513595 (PMC11759301; doi:10.3389/fimmu.2024.1513595)
Supplement: Supplementary file 11 [file Table5.xlsx]

## Sheet: Sheet1
Supplementary Table S5. Differentially expressed genes (DEGs) in Parp7HA/HA Cas9 compared with C57BL/6 Cas9 tumours.
baseMean	log2FoldChange	lfcSE	pvalue	padj	Ensembl	Entrez	Symbol
72.359	1.09652	0.262779	3.01e-05	0.0018023	ENSMUSG00000029408	56325	Abcb9
1096.56	1.4841	0.309856	1.67e-06	0.000216983	ENSMUSG00000020865	76408	Abcc3
17.0028	4.15769	0.985811	2.47e-05	0.00158022	ENSMUSG00000024254	67470	Abcg8
427.022	1.07672	0.197574	5.04e-08	1.43e-05	ENSMUSG00000056938	67131	Acbd4
14.1932	-3.38573	0.830943	4.61e-05	0.00238517	ENSMUSG00000068614	11464	Actc1
306.659	1.12994	0.219773	2.73e-07	5.54e-05	ENSMUSG00000037761	109275	Actr5
32.3141	-4.51201	1.08498	3.2e-05	0.00186869	ENSMUSG00000031553	11497	Adam3
18.3574	3.93158	0.642345	9.32e-10	5.01e-07	ENSMUSG00000037437	353188	Adam32
223.862	1.95847	0.439115	8.19e-06	0.000722231	ENSMUSG00000037860	383619	Aim2
67.2159	1.23351	0.345998	0.000363739	0.00940604	ENSMUSG00000029419	381353	Ajm1
924.161	1.41784	0.288831	9.16e-07	0.000136392	ENSMUSG00000021211	622402	Akr1c12
1748.83	1.31643	0.287083	4.53e-06	0.000463536	ENSMUSG00000021213	27384	Akr1c13
8.97576	6.10962	1.22643	6.31e-07	0.000106782	ENSMUSG00000028307	230163	Aldob
414.637	1.14164	0.281738	5.08e-05	0.00251938	ENSMUSG00000017390	11676	Aldoc
314.902	-5.29325	0.974403	5.56e-08	1.53e-05	ENSMUSG00000018924	11687	Alox15
43.8353	3.90481	1.0466	0.000190768	0.00630744	ENSMUSG00000079440	76768	Alpi
2444.13	1.31955	0.371982	0.000389121	0.00981266	ENSMUSG00000020440	11844	Arf5
1692.85	1.1046	0.205025	7.14e-08	1.81e-05	ENSMUSG00000040964	72754	Arhgef10l
94.8123	-1.05437	0.279708	0.000163542	0.00571868	ENSMUSG00000033460	78248	Armcx1
270.911	-1.03376	0.258517	6.37e-05	0.00296433	ENSMUSG00000033436	67416	Armcx2
600.946	-1.03759	0.250261	3.38e-05	0.00192854	ENSMUSG00000049047	71703	Armcx3
466.382	1.37509	0.302409	5.44e-06	0.000543021	ENSMUSG00000033781	142688	Asb13
468.647	-1.30191	0.359524	0.00029323	0.00816976	ENSMUSG00000021388	66695	Aspn
1194.01	1.08174	0.281299	0.000120303	0.00457735	ENSMUSG00000025142	68938	Aspscr1
116.85	1.27307	0.306425	3.26e-05	0.00188893	ENSMUSG00000062683	67942	Atp5mc2
111588	-1.57342	0.372205	2.37e-05	0.00152448	ENSMUSG00000064357	17705	ATP6
29.0884	3.90317	0.914192	1.96e-05	0.00132541	ENSMUSG00000013418	14422	B4galnt2
114.656	-2.13932	0.535899	6.55e-05	0.00298533	ENSMUSG00000027792	12038	Bche
144.207	2.00417	0.515162	0.000100094	0.00401165	ENSMUSG00000030200	66813	Bcl2l14
16.716	-1.58996	0.436971	0.000274131	0.00785296	ENSMUSG00000037418	24115	Best1
2476.53	1.81273	0.329412	3.74e-08	1.13e-05	ENSMUSG00000046718	69550	Bst2
901.518	-1.04319	0.249829	2.97e-05	0.00180117	ENSMUSG00000040565	107182	Btaf1
63.1394	1.81661	0.474382	0.000128439	0.00480228	ENSMUSG00000026405	12269	C4bp
171.395	1.99796	0.537919	0.000203818	0.00653202	ENSMUSG00000034656	12286	Cacna1a
68.8351	-2.10364	0.426363	8.06e-07	0.000125422	ENSMUSG00000032373	76459	Car12
779.511	1.01124	0.225151	7.08e-06	0.000656216	ENSMUSG00000053411	52609	Cbx7
718.772	1.22345	0.303755	5.63e-05	0.00271684	ENSMUSG00000028461	622404	Ccdc107
244.331	-3.5122	0.571026	7.72e-10	4.3e-07	ENSMUSG00000091119	100039139	Ccdc152
61.1803	2.04809	0.386986	1.21e-07	2.78e-05	ENSMUSG00000019767	100504234	Ccdc170
93.3912	1.44621	0.3488	3.38e-05	0.00192854	ENSMUSG00000026676	74186	Ccdc3
48.9106	1.50974	0.37554	5.82e-05	0.00278254	ENSMUSG00000048445	71276	Ccdc57
332.562	-1.12209	0.237066	2.21e-06	0.000268802	ENSMUSG00000046753	320234	Ccdc66
676.499	-1.17057	0.251173	3.16e-06	0.000345033	ENSMUSG00000032740	108686	Ccdc88a
86.6509	-3.954	0.857573	4.01e-06	0.000425311	ENSMUSG00000035448	12771	Ccr3
79.6148	3.87838	0.820787	2.3e-06	0.000275767	ENSMUSG00000025497	72040	Cdhr5
92.0821	3.23474	0.753742	1.77e-05	0.00124073	ENSMUSG00000029646	12591	Cdx2
2.08707	5.14906	1.44241	0.000357315	0.00932365	ENSMUSG00000030472	72431	Ceacam18
1992.74	1.35446	0.332403	4.61e-05	0.00238517	ENSMUSG00000056501	12608	Cebpb
825.544	2.0853	0.456439	4.91e-06	0.000498836	ENSMUSG00000016028	12614	Celsr1
279.587	-1.05984	0.205267	2.43e-07	5.18e-05	ENSMUSG00000073542	225659	Cep76
42.7941	3.24702	0.883568	0.000237945	0.00711117	ENSMUSG00000061825	234671	Ces2c
28.4753	2.85829	0.752639	0.000146052	0.0052234	ENSMUSG00000062826	71903	Ces2f
1280.83	2.37952	0.516751	4.13e-06	0.000434917	ENSMUSG00000031877	72361	Ces2g
24.3619	3.29506	0.883234	0.000190968	0.00630744	ENSMUSG00000049154	75429	Cfap144
271.675	1.12292	0.237867	2.35e-06	0.000279809	ENSMUSG00000030086	66098	Chchd6
359.242	-1.1692	0.260867	7.4e-06	0.000672358	ENSMUSG00000078185	12663	Chml
897.135	1.20937	0.260179	3.35e-06	0.000359232	ENSMUSG00000045193	12696	Cirbp
84.7914	3.57824	0.880617	4.84e-05	0.00243629	ENSMUSG00000028255	23844	Clca1
1386.73	1.46172	0.372236	8.61e-05	0.00363479	ENSMUSG00000022843	12724	Clcn2
9.92058	5.67884	1.04697	5.83e-08	1.57e-05	ENSMUSG00000050866	212070	Clrn3
204.724	2.23445	0.495638	6.54e-06	0.000634386	ENSMUSG00000022225	17228	Cma1
222.182	1.92633	0.440029	1.2e-05	0.00092068	ENSMUSG00000020638	22169	Cmpk2
13.7493	3.78312	1.01364	0.000189811	0.00630539	ENSMUSG00000039462	12813	Col10a1
581.474	-1.12984	0.180714	4.05e-10	2.41e-07	ENSMUSG00000025981	67876	Coq10b
858.549	1.01475	0.271314	0.000183912	0.00618074	ENSMUSG00000026090	72097	Cracdl
513.412	-1.24411	0.326391	0.000138011	0.00504017	ENSMUSG00000036356	234356	Csgalnact1
9.92362	4.93714	1.12091	1.06e-05	0.000876027	ENSMUSG00000027445	13013	Cst9
5.05635	6.13618	1.49417	4.01e-05	0.00218651	ENSMUSG00000027446	77705	Cstdc2
826.777	-1.64056	0.301488	5.28e-08	1.47e-05	ENSMUSG00000054196	68588	Cthrc1
934.077	-1.00131	0.204939	1.03e-06	0.000149452	ENSMUSG00000032030	75717	Cul5
120.001	1.43107	0.366417	9.4e-05	0.00384788	ENSMUSG00000044365	319478	Cxxc4
19.5532	2.62414	0.73082	0.000329818	0.00876503	ENSMUSG00000032323	13070	Cyp11a1
8.40151	-3.87673	0.887438	1.25e-05	0.000939809	ENSMUSG00000030670	244209	Cyp2r1
39.7138	5.37977	0.868735	5.92e-10	3.41e-07	ENSMUSG00000024292	64385	Cyp4f14
241.127	2.02399	0.453036	7.91e-06	0.000704259	ENSMUSG00000062563	12879	Cys1
255.33	1.06179	0.231456	4.49e-06	0.000463536	ENSMUSG00000043311	114585	D17H6S53E
97.3808	2.56661	0.609394	2.53e-05	0.00159762	ENSMUSG00000020182	13195	Ddc
253.099	2.12646	0.580561	0.000249499	0.00740523	ENSMUSG00000048489	213393	Depp1
205.116	2.16131	0.444023	1.13e-06	0.0001613	ENSMUSG00000017830	80861	Dhx58
65.9307	1.25375	0.334127	0.000175205	0.00596643	ENSMUSG00000036186	56279	Dipk1b
508.364	1.27358	0.328411	0.000105318	0.00416308	ENSMUSG00000014773	13388	Dll1
885.073	-1.06837	0.24391	1.19e-05	0.00092068	ENSMUSG00000037416	240283	Dmxl1
271.035	1.83744	0.357292	2.71e-07	5.54e-05	ENSMUSG00000009145	93838	Dqx1
15.8851	3.59323	0.809737	9.1e-06	0.000782026	ENSMUSG00000028635	13615	Edn2
447.576	1.00607	0.187779	8.43e-08	2.06e-05	ENSMUSG00000022544	70511	Eef2kmt
206.806	-1.08579	0.301201	0.000312292	0.0085166	ENSMUSG00000033730	13655	Egr3
168.228	1.23243	0.318049	0.000106632	0.00418628	ENSMUSG00000033857	217364	Engase
1408.72	-1.11098	0.188194	3.56e-09	1.54e-06	ENSMUSG00000046785	77781	Epm2aip1
465.751	1.91689	0.42659	7.01e-06	0.000656216	ENSMUSG00000010080	71889	Epn3
344.367	2.29527	0.504673	5.42e-06	0.000543021	ENSMUSG00000040600	99662	Eps8l3
278.326	-1.54514	0.426185	0.000288385	0.00809955	ENSMUSG00000035095	219148	Fam167a
135.365	-29.5016	4.40305	2.08e-11	2e-08	ENSMUSG00000094103	100101807	Fam177a2
519.441	-2.33966	0.454564	2.65e-07	5.51e-05	ENSMUSG00000043633	242408	Fam221b
31.247	3.488	0.816358	1.93e-05	0.00131895	ENSMUSG00000021749	18300	Fam3d
264.606	1.9869	0.557275	0.000363312	0.00940604	ENSMUSG00000054161	73813	Fam83e
688.973	1.08392	0.251095	1.58e-05	0.00114429	ENSMUSG00000046761	105732	Fam83h
318.168	1.18733	0.298924	7.13e-05	0.0031648	ENSMUSG00000030590	73833	Fam98c
28.5353	3.01876	0.723327	3e-05	0.0018023	ENSMUSG00000005339	14125	Fcer1a
482.082	-1.43261	0.282026	3.78e-07	7.17e-05	ENSMUSG00000074971	67606	Fibin
82.661	1.51878	0.253	1.94e-09	9.29e-07	ENSMUSG00000067199	14296	Frat1
177.481	1.48813	0.256217	6.32e-09	2.54e-06	ENSMUSG00000047604	212398	Frat2
1318.83	-1.006	0.265583	0.000151943	0.0053674	ENSMUSG00000048285	319710	Frmd6
540.212	-1.17529	0.314464	0.000185895	0.00622317	ENSMUSG00000027955	68659	Gask1b
64.7767	1.88794	0.520796	0.000288834	0.00809955	ENSMUSG00000039131	54120	Gipc2
744.75	-1.10672	0.302222	0.000250319	0.00741684	ENSMUSG00000020176	14783	Grb10
937.027	1.35803	0.358208	0.000149938	0.00532926	ENSMUSG00000003378	14809	Grik5
31014.5	1.45269	0.356875	4.69e-05	0.00239652	ENSMUSG00000073411	14964	H2-D1
126.757	2.96243	0.773198	0.000127418	0.00479379	ENSMUSG00000016283	14990	H2-M2
357.604	1.25061	0.328986	0.00014387	0.00519764	ENSMUSG00000016206	14991	H2-M3
188.371	2.10683	0.583885	0.000308208	0.00843737	ENSMUSG00000079491	15024	H2-T10
2230.19	1.41959	0.383291	0.000212499	0.00669849	ENSMUSG00000060032	232440	H2aj
22.9916	3.26085	0.766192	2.08e-05	0.00139103	ENSMUSG00000027261	15112	Hao1
287.871	1.40686	0.320873	1.16e-05	0.00092068	ENSMUSG00000006930	15114	Hap1
269.894	-1.56785	0.405738	0.000111453	0.00432639	ENSMUSG00000022367	15117	Has2
1289.92	-2.58605	0.614682	2.59e-05	0.00162449	ENSMUSG00000069917	110257	Hba-a2
14.0946	-2.23283	0.538515	3.38e-05	0.00192854	ENSMUSG00000034551	245596	Hdx
1374.62	1.13128	0.259648	1.32e-05	0.000986189	ENSMUSG00000034586	217310	Hid1
65.1932	2.44744	0.557824	1.15e-05	0.00092068	ENSMUSG00000017688	30942	Hnf4g
70.0384	1.38892	0.374276	0.000206481	0.00660105	ENSMUSG00000062007	209488	Hsh2d
68.7732	-1.7108	0.458001	0.000187438	0.00625059	ENSMUSG00000034997	15558	Htr2a
75.9299	-1.38188	0.328735	2.63e-05	0.00163802	ENSMUSG00000035878	235386	Hykk
245.524	2.23602	0.409617	4.79e-08	1.38e-05	ENSMUSG00000021208	217845	Ifi27l2b
551.283	1.29066	0.269934	1.74e-06	0.000221726	ENSMUSG00000010358	70110	Ifi35
18.8727	5.21771	1.19073	1.18e-05	0.00092068	ENSMUSG00000039146	15061	Ifi44l
42.3963	2.48822	0.699151	0.000372384	0.00952973	ENSMUSG00000079339	667373	Ifit1bl1
557.375	2.15741	0.380499	1.43e-08	5.14e-06	ENSMUSG00000074896	15959	Ifit3
131.141	1.62977	0.365902	8.42e-06	0.000731198	ENSMUSG00000062488	667370	Ifit3b
111.622	-9.8586	2.44451	5.51e-05	0.00266509	ENSMUSG00000094088	380823	Ighv1-64
14.5394	-18.2565	4.42661	3.72e-05	0.00205918	ENSMUSG00000076536	243451	Igkv4-86
1700.59	1.20829	0.284357	2.15e-05	0.00141439	ENSMUSG00000030281	171095	Il17rc
432.307	1.96664	0.498072	7.86e-05	0.00339603	ENSMUSG00000043088	57890	Il17re
1445.02	1.74974	0.345536	4.11e-07	7.63e-05	ENSMUSG00000026981	16181	Il1rn
2007.26	-1.41087	0.392848	0.000328934	0.00876426	ENSMUSG00000024810	77125	Il33
452.307	1.26415	0.346474	0.000263651	0.00764145	ENSMUSG00000091811	66300	Inafm1
3331.57	-1.41188	0.376967	0.00018013	0.00608917	ENSMUSG00000041324	16323	Inhba
804.081	2.8496	0.455375	3.91e-10	2.41e-07	ENSMUSG00000025498	54123	Irf7
367.608	2.50535	0.364809	6.53e-12	7.05e-09	ENSMUSG00000035692	100038882	Isg15
47.2665	-1.19043	0.330693	0.000318445	0.00859547	ENSMUSG00000025321	320910	Itgb8
614.735	-1.29057	0.295181	1.23e-05	0.00093188	ENSMUSG00000031239	16431	Itm2a
41.0555	2.60584	0.588249	9.43e-06	0.000796742	ENSMUSG00000027296	228550	Itpka
729.375	1.05078	0.267778	8.71e-05	0.00365038	ENSMUSG00000055675	74901	Kbtbd11
7.67056	-2.56146	0.690984	0.000209755	0.00664827	ENSMUSG00000054978	74492	Kbtbd13
1305.26	1.33099	0.239375	2.69e-08	8.46e-06	ENSMUSG00000041642	16565	Kif21b
741.399	1.22408	0.318702	0.000122625	0.00462681	ENSMUSG00000031788	16582	Kifc3
454.66	-1.10529	0.212824	2.06e-07	4.57e-05	ENSMUSG00000020948	66689	Klhl28
13938.5	1.16728	0.3141	0.000202194	0.00651623	ENSMUSG00000020911	16669	Krt19
206.888	1.49068	0.350766	2.14e-05	0.00141439	ENSMUSG00000030124	16768	Lag3
121.303	-1.72394	0.476722	0.000298906	0.00826129	ENSMUSG00000096740	102308570	Lbhd1
2164.71	1.11123	0.290598	0.000131336	0.00487894	ENSMUSG00000016024	16803	Lbp
170.734	-1.46169	0.327405	8.03e-06	0.000711027	ENSMUSG00000024766	381236	Lipo3
86.8818	2.3613	0.477807	7.73e-07	0.000124861	ENSMUSG00000062044	381983	Lmtk3
3.10144	4.79144	1.31317	0.000263509	0.00764145	ENSMUSG00000094915	671917	LOC671917
4809.94	-1.54656	0.40709	0.000145243	0.00520523	ENSMUSG00000024529	16948	Lox
219.238	2.59682	0.663593	9.11e-05	0.00377173	ENSMUSG00000026961	227618	Lrrc26
266.71	1.09518	0.2959	0.000214589	0.00671523	ENSMUSG00000046417	192976	Lrrc75a
252.269	2.01802	0.546648	0.000222831	0.00689264	ENSMUSG00000024399	16994	Ltb
26.6724	6.85892	1.13119	1.33e-09	6.58e-07	ENSMUSG00000013643	70163	Lypd8
73.2066	2.19854	0.431199	3.42e-07	6.64e-05	ENSMUSG00000044313	242125	Mab21l3
12.3147	3.43106	0.695845	8.19e-07	0.000126066	ENSMUSG00000024786	622554	Majin
2808.08	-1.16928	0.191175	9.58e-10	5.01e-07	ENSMUSG00000024383	26405	Map3k2
2449.31	-1.08661	0.247899	1.17e-05	0.00092068	ENSMUSG00000022139	105559	Mbnl2
267.913	2.06904	0.41064	4.69e-07	8.35e-05	ENSMUSG00000061068	17227	Mcpt4
989.25	1.13329	0.258837	1.2e-05	0.00092068	ENSMUSG00000035852	78906	Misp
1141.73	1.02631	0.262945	9.5e-05	0.00387787	ENSMUSG00000002227	17454	Mov10
574.253	1.00695	0.171993	4.78e-09	1.97e-06	ENSMUSG00000071711	246221	Mpst
10.2274	3.54727	0.959423	0.000217909	0.00679452	ENSMUSG00000024680	14126	Ms4a2
313.993	2.27576	0.572452	7.02e-05	0.00313541	ENSMUSG00000000386	17857	Mx1
79.6222	2.40766	0.421279	1.1e-08	4.03e-06	ENSMUSG00000023341	17858	Mx2
336.436	1.96265	0.545551	0.00032122	0.00862947	ENSMUSG00000030739	71960	Myh14
150.629	-9.21104	2.48343	0.000208083	0.00661958	ENSMUSG00000053093	140781	Myh7
717.885	1.95869	0.507245	0.000112731	0.0043564	ENSMUSG00000034427	217328	Myo15b
68.4996	2.08276	0.572771	0.000276599	0.00791056	ENSMUSG00000025401	432516	Myo1a
67.5516	4.33654	0.887328	1.02e-06	0.000149452	ENSMUSG00000024388	17922	Myo7b
10.5409	-5.74447	1.50276	0.000132051	0.00489495	ENSMUSG00000026697	17926	Myoc
256.251	1.06704	0.279198	0.000132488	0.00489663	ENSMUSG00000022671	72083	Mzt2
4965	-1.62639	0.437463	0.000200978	0.0065013	ENSMUSG00000064360	17718	ND3
515.991	1.5419	0.336018	4.46e-06	0.000463536	ENSMUSG00000034413	240055	Neurl1b
392.479	1.32033	0.330608	6.51e-05	0.00298533	ENSMUSG00000042419	18038	Nfkbil1
52.3878	2.97966	0.775808	0.000122674	0.00462681	ENSMUSG00000022809	18171	Nr1i2
104.717	-1.5727	0.38848	5.16e-05	0.00253865	ENSMUSG00000062991	211323	Nrg1
568.906	2.08876	0.443661	2.5e-06	0.00029394	ENSMUSG00000052776	246730	Oas1a
143.144	2.21129	0.335519	4.38e-11	3.78e-08	ENSMUSG00000029605	23961	Oas1b
72.1086	1.51699	0.406859	0.000192589	0.00634881	ENSMUSG00000001166	114643	Oas1c
209.437	2.53431	0.53604	2.27e-06	0.000274118	ENSMUSG00000066861	23960	Oas1g
505.404	2.53029	0.525868	1.5e-06	0.000200454	ENSMUSG00000032690	246728	Oas2
519.217	2.84875	0.537177	1.14e-07	2.66e-05	ENSMUSG00000032661	246727	Oas3
534.701	1.71753	0.335917	3.17e-07	6.3e-05	ENSMUSG00000041827	231655	Oasl1
1492.77	1.07646	0.239718	7.1e-06	0.000656216	ENSMUSG00000049401	72075	Ogfr
53.1005	-1.27197	0.23745	8.47e-08	2.06e-05	ENSMUSG00000057503	258684	Or5b106
8.39833	-5.85551	1.07207	4.71e-08	1.38e-05	ENSMUSG00000059031	258728	Or5p58
274.477	-4.12735	0.466248	8.58e-19	1.85e-15	ENSMUSG00000051118	258336	Or7d10
104.178	1.03308	0.272387	0.000149015	0.00531645	ENSMUSG00000014301	66449	Pam16
50.5066	1.93523	0.40187	1.47e-06	0.000198085	ENSMUSG00000041423	68957	Paqr6
917.318	1.15329	0.273793	2.53e-05	0.00159762	ENSMUSG00000063268	671535	Parp10
42.1443	2.49043	0.619033	5.74e-05	0.00275609	ENSMUSG00000020072	67307	Pbld2
359.386	-2.08695	0.430859	1.27e-06	0.000177535	ENSMUSG00000029108	54216	Pcdh7
58.9564	-1.5938	0.440535	0.000297021	0.00822512	ENSMUSG00000023868	23984	Pde10a
633.271	-1.22469	0.334821	0.000254451	0.00748788	ENSMUSG00000030671	18576	Pde3b
200.589	1.03369	0.216216	1.75e-06	0.000221726	ENSMUSG00000038208	320655	Pgap3
2035.93	1.17707	0.321533	0.000251406	0.00743629	ENSMUSG00000031807	66171	Pgls
31.6319	3.97969	1.09103	0.000264655	0.00765771	ENSMUSG00000041653	116939	Pnpla3
2.71119	3.56934	1.00352	0.000375388	0.0095782	ENSMUSG00000078451	73075	Ppil6
268.645	-1.9651	0.329227	2.39e-09	1.06e-06	ENSMUSG00000121724	434233	Ppp1ccb
9.70585	3.98001	1.00248	7.18e-05	0.00318102	ENSMUSG00000027317	72112	Ppp1r14d
131.19	-1.23575	0.308977	6.35e-05	0.00296372	ENSMUSG00000048960	109294	Prex2
185.572	-1.97971	0.532597	0.000201537	0.0065072	ENSMUSG00000050558	246313	Prokr2
109.784	-3.76304	0.406325	2.02e-20	4.99e-17	ENSMUSG00000057762	620648	Prp2rt
2468.59	1.53579	0.417188	0.000232051	0.00699556	ENSMUSG00000031897	19171	Psmb10
384.672	-1.05935	0.297808	0.000374882	0.0095782	ENSMUSG00000026384	19258	Ptpn4
1065.2	-1.43517	0.264937	6.06e-08	1.61e-05	ENSMUSG00000020154	19263	Ptprb
104.623	2.86026	0.667948	1.85e-05	0.00128291	ENSMUSG00000035429	545902	Ptprh
107.758	-1.20874	0.324422	0.000194679	0.00638117	ENSMUSG00000042515	245631	Pwwp3b
60.6579	1.90918	0.530357	0.000318461	0.00859547	ENSMUSG00000026304	19329	Rab17
26.2765	2.18021	0.466167	2.91e-06	0.000324611	ENSMUSG00000020732	58222	Rab37
886.971	1.43927	0.257462	2.27e-08	7.53e-06	ENSMUSG00000030055	69834	Rab43
551.744	1.6637	0.399665	3.14e-05	0.00185399	ENSMUSG00000004952	54153	Rasa4
282.325	1.80053	0.486146	0.000212503	0.00669849	ENSMUSG00000032454	19660	Rbp2
65.4333	-1.8933	0.40323	2.66e-06	0.000307204	ENSMUSG00000052852	52250	Reep1
275.863	1.03405	0.208919	7.44e-07	0.00012123	ENSMUSG00000034175	279766	Rhbdd3
259.064	1.53129	0.341296	7.23e-06	0.000664704	ENSMUSG00000001313	11858	Rnd2
4144.64	-1.02063	0.14732	4.27e-12	5.27e-09	ENSMUSG00000020580	19878	Rock2
25878.7	1.33091	0.32481	4.18e-05	0.00224038	ENSMUSG00000074129	22121	Rpl13a
231.559	-2.39914	0.565595	2.22e-05	0.00145537	ENSMUSG00000078193	100038991	Rpl35rt
5912.86	1.63726	0.415786	8.23e-05	0.00353449	ENSMUSG00000057863	54217	Rpl36
450.737	-1.65595	0.261856	2.55e-10	1.65e-07	ENSMUSG00000121818	100502825	Rpl37rt
9914.25	1.09174	0.280397	9.88e-05	0.00398666	ENSMUSG00000040952	20085	Rps19
1039.07	1.22914	0.301166	4.48e-05	0.00233744	ENSMUSG00000020516	72508	Rps6kb1
220.681	2.01615	0.461083	1.23e-05	0.00093188	ENSMUSG00000020641	58185	Rsad2
262.797	1.53586	0.31183	8.42e-07	0.000127625	ENSMUSG00000045287	237847	Rtn4rl1
599.767	1.61981	0.39673	4.45e-05	0.00232822	ENSMUSG00000033355	67775	Rtp4
1221.51	1.68999	0.454038	0.000197543	0.00643841	ENSMUSG00000046229	19018	Scand1
111.287	1.78606	0.455958	8.96e-05	0.0037204	ENSMUSG00000030340	20276	Scnn1a
1656.56	-1.1018	0.275076	6.19e-05	0.00291366	ENSMUSG00000039234	69608	Sec24d
1215.9	2.60103	0.449209	7.03e-09	2.76e-06	ENSMUSG00000025207	26456	Sema4g
244.894	-1.30121	0.326953	6.9e-05	0.00310263	ENSMUSG00000021403	20706	Serpinb9b
140.341	1.26274	0.296991	2.12e-05	0.00140912	ENSMUSG00000073758	66938	Sh3d21
78.6935	-1.77892	0.490589	0.000287744	0.00809527	ENSMUSG00000051367	20471	Six1
29.849	2.81307	0.67533	3.11e-05	0.00183814	ENSMUSG00000001095	20500	Slc13a2
91.2626	1.04552	0.275193	0.000145144	0.00520523	ENSMUSG00000023393	228993	Slc17a9
417.923	2.26612	0.405787	2.34e-08	7.64e-06	ENSMUSG00000000154	18400	Slc22a18
1346.8	1.0356	0.23022	6.85e-06	0.000649693	ENSMUSG00000025792	27376	Slc25a10
89.2091	-1.63688	0.397313	3.79e-05	0.00209202	ENSMUSG00000036298	239606	Slc2a13
859.762	1.09148	0.290148	0.000168697	0.00584402	ENSMUSG00000025993	53945	Slc40a1
6.58103	2.71733	0.712518	0.000136898	0.00501013	ENSMUSG00000021565	74338	Slc6a19
45.7845	2.03848	0.521501	9.27e-05	0.00381446	ENSMUSG00000048442	66528	Smim5
3738.47	1.31797	0.339431	0.000103222	0.00408958	ENSMUSG00000031906	58994	Smpd3
16.1384	4.18245	0.828994	4.53e-07	8.32e-05	ENSMUSG00000038541	94224	Srd5a2
776.111	1.21609	0.277331	1.16e-05	0.00092068	ENSMUSG00000026811	50935	St6galnac6
181.283	-1.01327	0.243771	3.23e-05	0.00187851	ENSMUSG00000026646	64707	Suv39h2
2832.02	1.08336	0.293293	0.00022093	0.00687629	ENSMUSG00000023118	68188	Sympk
3381.91	1.7167	0.472435	0.000279343	0.00792344	ENSMUSG00000037321	21354	Tap1
7140.04	1.2174	0.299869	4.91e-05	0.00245216	ENSMUSG00000024308	21356	Tapbp
39.567	2.54786	0.647822	8.39e-05	0.00356994	ENSMUSG00000001444	57765	Tbx21
13.984	6.41053	1.27817	5.29e-07	9.09e-05	ENSMUSG00000090356	66561	Teddm3
51.9102	2.33153	0.638289	0.000259412	0.0075694	ENSMUSG00000053675	74176	Tgm5
214.362	1.20006	0.243449	8.25e-07	0.000126066	ENSMUSG00000017713	71776	Tha1
370.222	1.36386	0.30322	6.86e-06	0.000649693	ENSMUSG00000039759	69876	Thap3
524.602	-2.52286	0.649259	0.000102011	0.00406023	ENSMUSG00000021702	21828	Thbs4
50.8717	2.53361	0.652333	0.000102783	0.00408156	ENSMUSG00000032625	330267	Thsd7a
665.323	1.82765	0.446308	4.22e-05	0.0022573	ENSMUSG00000034917	27375	Tjp3
99.631	2.30681	0.558673	3.64e-05	0.00203603	ENSMUSG00000062545	384059	Tlr12
11.3513	-2.57245	0.597526	1.67e-05	0.00118617	ENSMUSG00000070498	208151	Tmem132b
971.773	1.74839	0.419042	3.01e-05	0.0018023	ENSMUSG00000054871	72309	Tmem158
196.901	1.40143	0.363009	0.000113114	0.0043606	ENSMUSG00000055692	224019	Tmem191
43.5463	1.39276	0.383853	0.000285206	0.00803694	ENSMUSG00000050270	338369	Tmem220
126.418	1.09967	0.246878	8.42e-06	0.000731198	ENSMUSG00000031951	234740	Tmem231
52.2714	1.81662	0.397792	4.95e-06	0.000500327	ENSMUSG00000084845	381582	Tmem240
90.8442	-1.26437	0.263093	1.54e-06	0.000204814	ENSMUSG00000074634	633640	Tmem267
28.0539	3.26312	0.799123	4.44e-05	0.00232822	ENSMUSG00000028786	66260	Tmem54
51.9089	5.15449	0.954865	6.73e-08	1.74e-05	ENSMUSG00000020839	66601	Tmigd1
50.7877	3.6396	0.782772	3.33e-06	0.000359232	ENSMUSG00000025347	71664	Tmt1b
227.309	1.12494	0.311635	0.000306447	0.0084025	ENSMUSG00000028958	64295	Tmub1
2036.11	-1.07177	0.270124	7.26e-05	0.00319803	ENSMUSG00000024614	67988	Tmx3
2940.15	1.38178	0.217074	1.95e-10	1.35e-07	ENSMUSG00000022791	51789	Tnk2
23.0885	3.50717	0.801904	1.22e-05	0.00093188	ENSMUSG00000040046	21990	Tph1
47.1211	-2.0894	0.475729	1.12e-05	0.000915118	ENSMUSG00000058126	621054	Tpm3-rs7
364.193	1.28781	0.31629	4.67e-05	0.00239329	ENSMUSG00000014846	67971	Tppp3
4.1979	6.60405	1.64348	5.86e-05	0.00278897	ENSMUSG00000058063	224762	Trim31
116.153	1.21459	0.315008	0.000115385	0.00440964	ENSMUSG00000042854	76367	Trp53rkb
46.2248	1.8436	0.516673	0.00035941	0.00933185	ENSMUSG00000006143	69665	Upk3bl
316.811	1.90817	0.374397	3.46e-07	6.64e-05	ENSMUSG00000030107	24110	Usp18
4519	1.03603	0.159519	8.32e-11	6.25e-08	ENSMUSG00000007029	22321	Vars1
1135.58	1.05406	0.232918	6.03e-06	0.000597518	ENSMUSG00000038838	68915	Vars2
103.98	-1.50506	0.278093	6.23e-08	1.63e-05	ENSMUSG00000090362	621430	Vmn2r79
80.4687	1.75204	0.475004	0.00022561	0.0069099	ENSMUSG00000043614	194309	Vps37d
1224.23	-3.29804	0.485679	1.12e-11	1.13e-08	ENSMUSG00000045690	72338	Wdr89
6.83124	3.66802	0.934447	8.66e-05	0.0036401	ENSMUSG00000033227	22420	Wnt6
4359.41	1.07801	0.299271	0.000315636	0.00855934	ENSMUSG00000024066	22436	Xdh
554.01	-2.89148	0.795644	0.000278912	0.00792344	ENSMUSG00000094410	667118	Zbed6
239.273	-1.12073	0.271481	3.66e-05	0.00203716	ENSMUSG00000049164	72672	Zfp518a
120.458	-1.04534	0.287616	0.000278518	0.00792344	ENSMUSG00000057842	218314	Zfp595
2336.7	1.00664	0.242731	3.37e-05	0.00192854	ENSMUSG00000085795	353310	Zfp703
501.682	1.51671	0.316281	1.62e-06	0.000212395	ENSMUSG00000054716	244216	Zfp771
69.3218	-1.14392	0.2986	0.000127657	0.00479379	ENSMUSG00000078866	628308	Zfp970
